# Supplementary material
Source: MDPI journal article supplement (https://www.mdpi.com/2073-4433/13/10/1679)
Supplement: s1 [file s1]

## Supplementary Materials:

Zichao Wan<sup>1,2,†</sup>, Kai Song<sup>1,2,†</sup>, Wenfei Zhu<sup>1</sup>, Ying Yu<sup>1</sup>, Hui Wang<sup>1</sup>, Ruizhe Shen<sup>1</sup>, Rui Tan<sup>1</sup>, Daqi Lv<sup>1</sup>, Yuanzheng Gong<sup>1</sup>, Xuena Yu<sup>1</sup>, Shiyi Chen<sup>1</sup>, Limin Zeng<sup>1,2</sup>, Shengrong Lou<sup>3</sup>, Yijun Yu<sup>4</sup>, Song Guo<sup>1,2,\*</sup>

### Contents

**Figure. S1.** Location of observation sites in Changzhou from 2<sup>nd</sup> November 2020 to 30<sup>th</sup> November 2020.

**Figure. S2.** Scatterplot of (a) toluene and benzene and (b) ethylbenzene and m/p-xylene.

**Figure. S3.** The distribution of measured ethylbenzene to m/p-xylene ratios during the observation.

**Figure. S4.** The regression line between OC and EC of the dataset with the lowest 0–10% percentile OC/EC ratios.

**Figure. S5.** Source profiles of measured VOCs in the observation.

**Figure. S6.** The diurnal variation of (a) styrene and (b) isoprene. The pink area represents the 95% confidence interval.

**Figure. S7.** The time series of SOA estimated by different approaches.

**Table S1.** Summary of the concentrations of VOCs during the observation (Unit: ppbv)

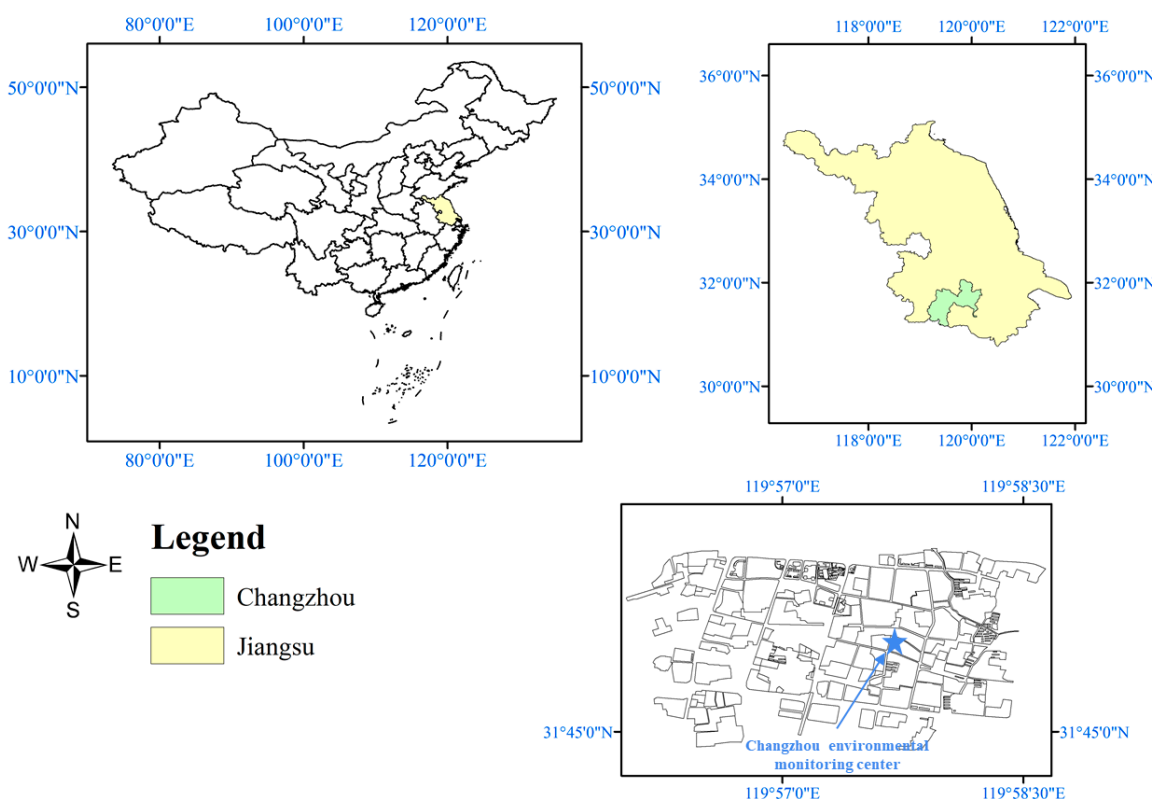

**Figure S1.** Location of observation sites in Changzhou from 2<sup>nd</sup> November 2020 to 30<sup>th</sup> November 2020.

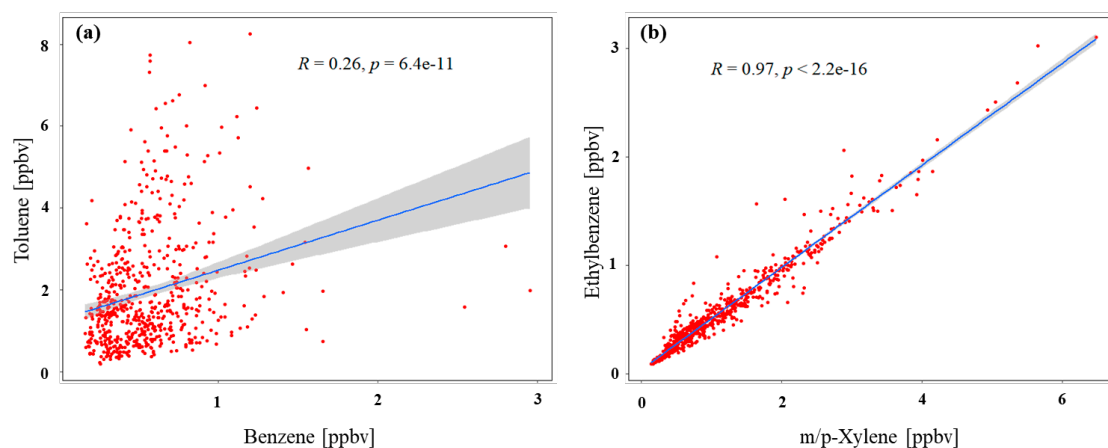

**Figure S2.** Scatterplot of (a) toluene and benzene and (b) ethylbenzene and m/p-xylene.

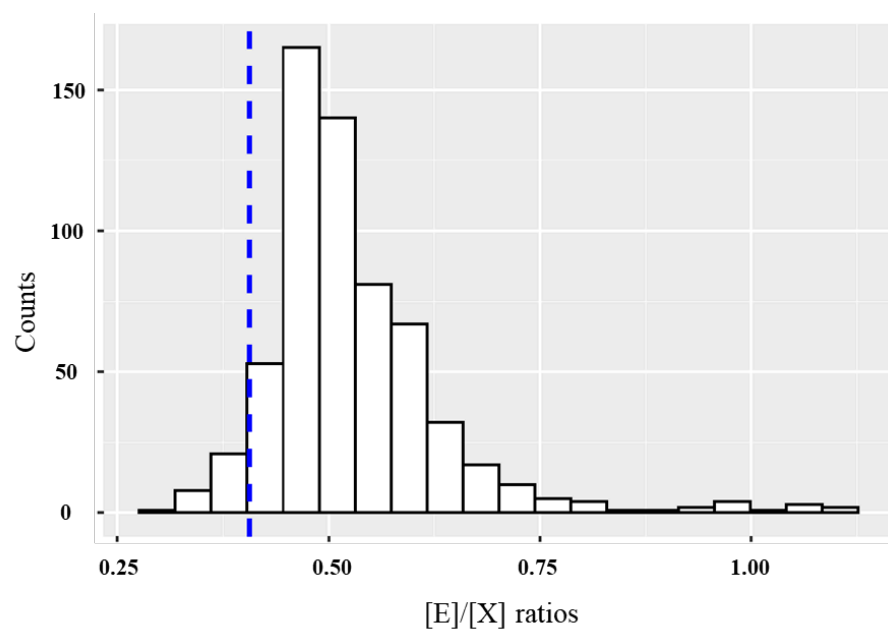

**Figure S3.** The distribution of measured ethylbenzene to m/p-xylene ratios during the observation.

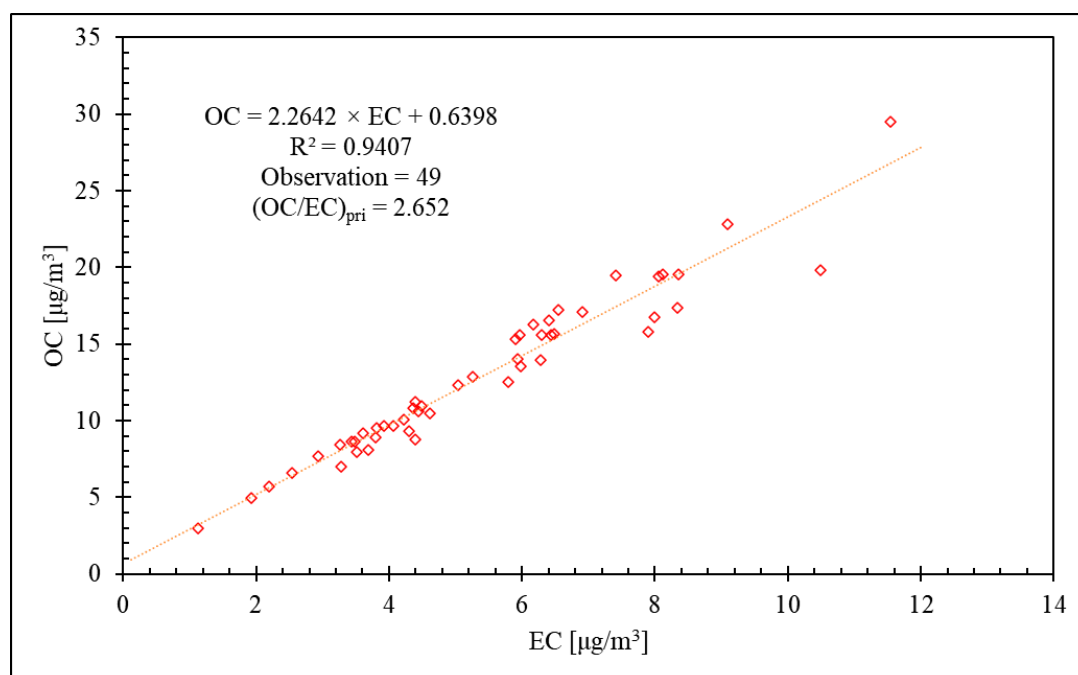

**Figure S4.** The regression line between OC and EC of the dataset with the lowest 0–10% percentile OC/EC ratios.

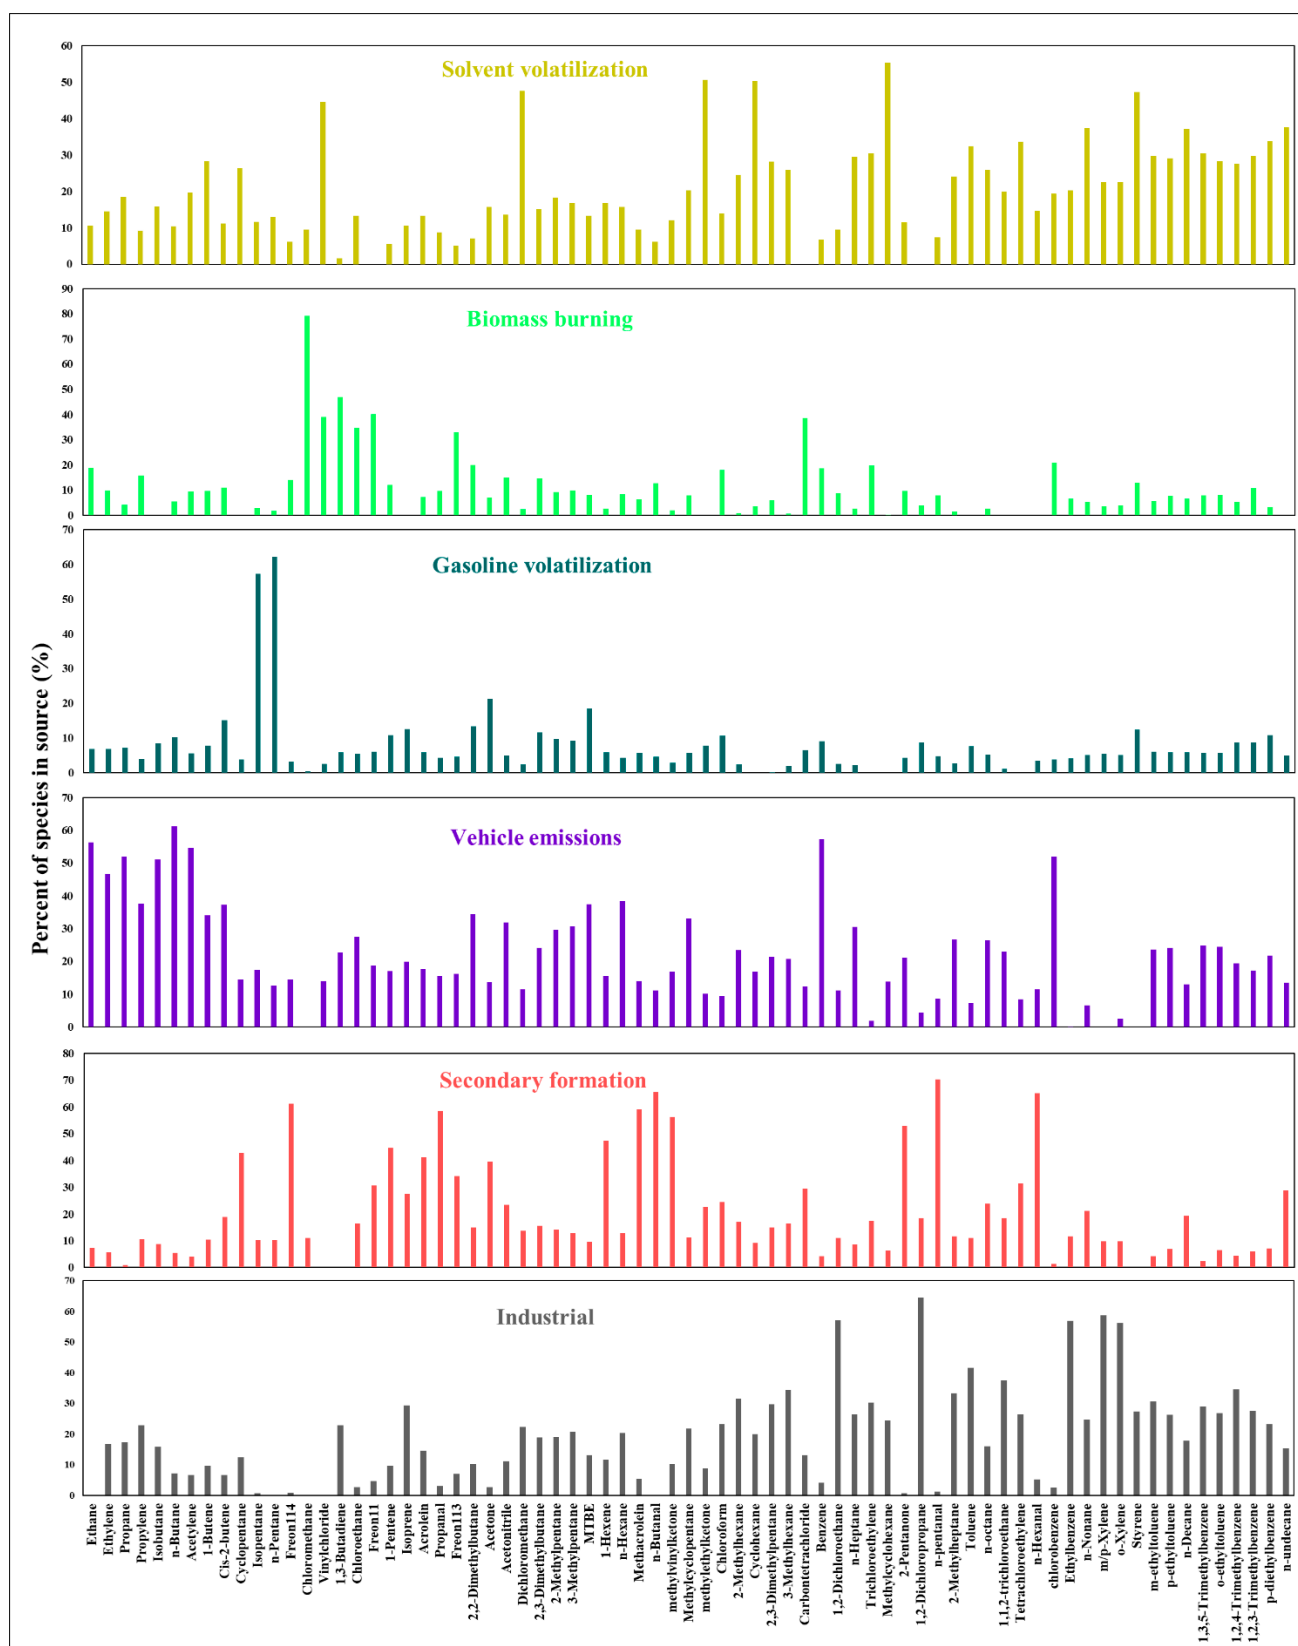

Figure S5. Source profiles of measured VOCs in the observation.

Factor 1 has a high content of light halogenated hydrocarbons (commonly used industrial raw materials or media), so we infer it as an industrial factor. Factor 2 has a high content of oxygenated organic, so we infer it as secondary formation. Factor 3 has a high content of C<sub>2</sub>-C<sub>6</sub> alkanes, ethylene, and propylene, etc., so we infer it as vehicle emissions.

In factor 4, the dominant species are isopentane and n-pentane, and some methyl tert-butyl ether, which are typical tracers of oil and gas volatilization, so we infer it as gasoline volatilization. In factor 5, the concentration of chloromethane (tracer of biomass combustion) is high, so factor 5 is inferred as biomass burning. Factor 6 has a high content of benzene series, and dichloromethane, etc., so we infer it as the solvent volatilization.

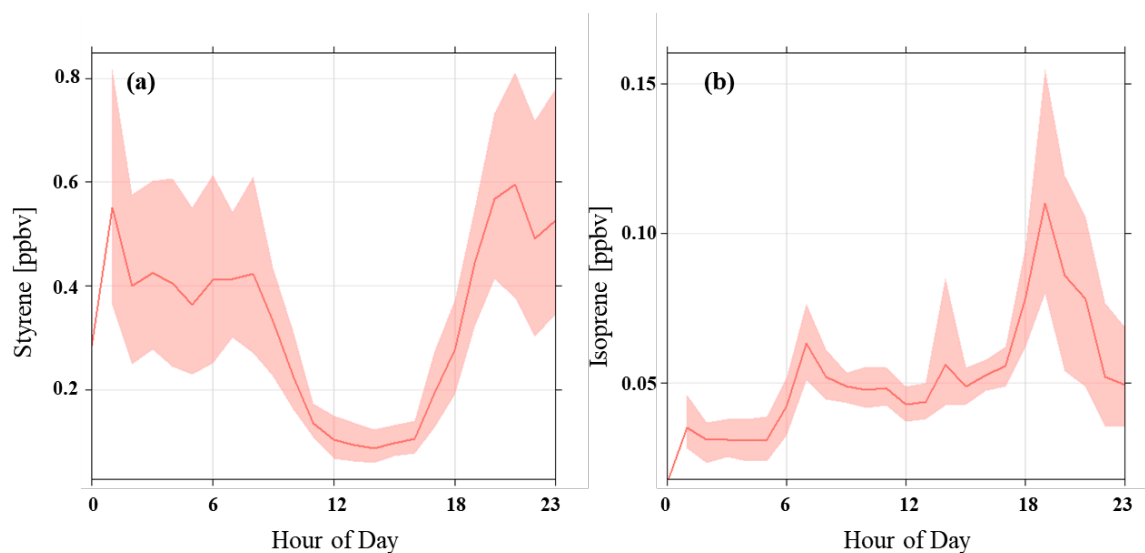

**Figure S6.** The diurnal variation of (a) styrene and (b) isoprene. The pink area represents the 95% confidence interval.

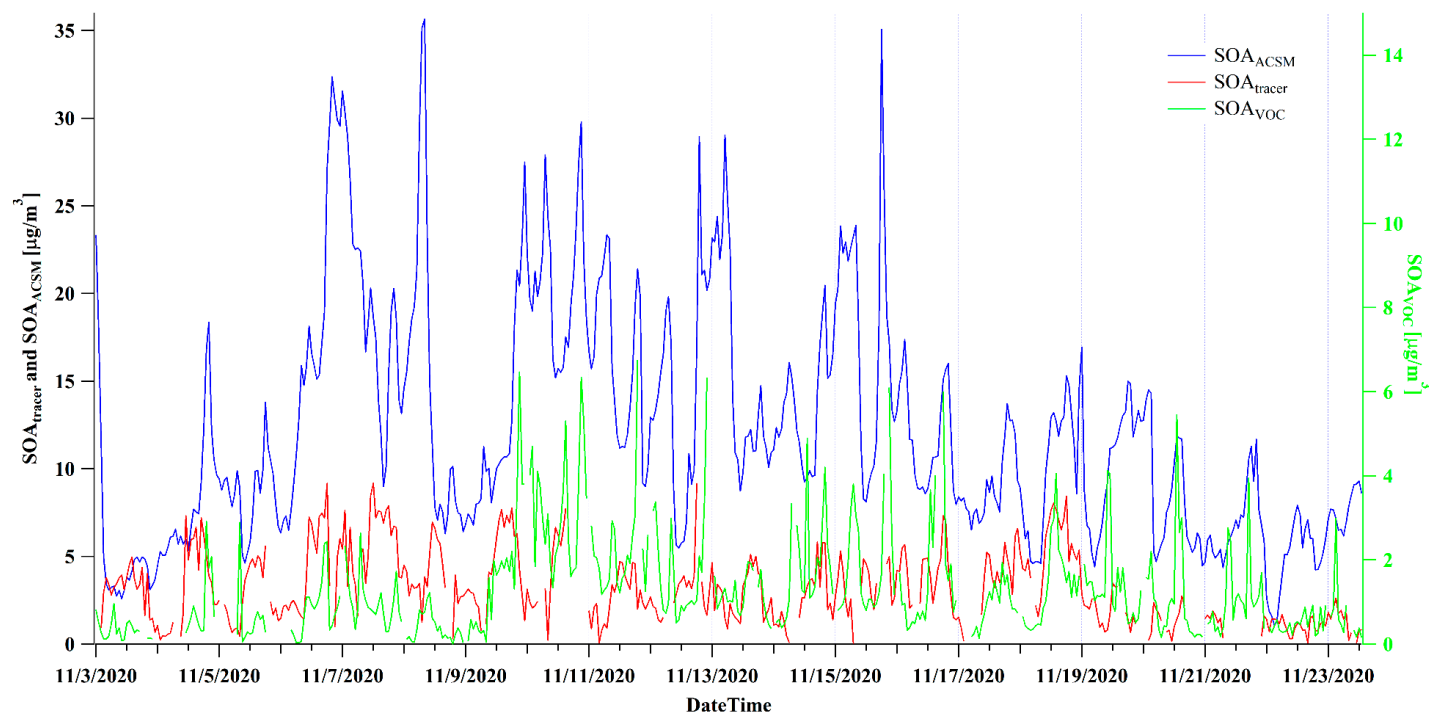

**Figure S7.** The time series of SOA estimated by different approaches.

**Table S1.** Summary of the concentrations of VOCs during the observation (Unit: ppbv).

| Species                | Mean  | Median | Species                   | Mean  | Median |
|------------------------|-------|--------|---------------------------|-------|--------|
| Ethane                 | 3.576 | 3.244  | 2-Methylhexane            | 0.100 | 0.079  |
| Ethylene               | 1.836 | 1.599  | Cyclohexane               | 0.166 | 0.095  |
| Propane                | 5.649 | 4.517  | 2,3-Dimethylpentane       | 0.046 | 0.035  |
| Propylene              | 0.485 | 0.408  | 3-Methylhexane            | 0.114 | 0.088  |
| Isobutane              | 1.032 | 0.860  | Carbontetrachloride       | 0.132 | 0.130  |
| n-Butane               | 1.257 | 1.111  | Benzene                   | 0.553 | 0.502  |
| Acetylene              | 1.534 | 1.269  | 2,2,4-Trimethylpentane    | 0.024 | 0.021  |
| trans-2-Butene         | 0.021 | 0.018  | 1,2-Dichloroethane        | 1.492 | 1.246  |
| 1-Butene               | 0.119 | 0.085  | n-Heptane                 | 0.155 | 0.115  |
| cis-2-Butene           | 0.074 | 0.068  | Trichloroethylene         | 0.184 | 0.112  |
| Cyclopentane           | 0.024 | 0.021  | Methylcyclohexane         | 0.179 | 0.097  |
| Isopentane             | 1.161 | 0.856  | 2-Pentanone               | 0.035 | 0.034  |
| n-Pentane              | 0.942 | 0.682  | 1,2-Dichloropropane       | 0.413 | 0.298  |
| Freon114               | 0.055 | 0.047  | n-Pentanal                | 0.121 | 0.100  |
| Chloromethane          | 0.340 | 0.288  | 3-pentanone               | 0.024 | 0.021  |
| Vinylchloride          | 0.059 | 0.022  | Bromodichloromethane      | 0.003 | 0.003  |
| 1,3-Butadiene          | 0.037 | 0.029  | 2,3,4-Trimethylpentane    | 0.015 | 0.014  |
| Acetaldehyde           | 2.747 | 2.287  | 2-Methylheptane           | 0.035 | 0.028  |
| Bromomethane           | 0.023 | 0.018  | 3-Methylheptane           | 0.027 | 0.021  |
| Chloroethane           | 0.083 | 0.048  | trans-1,3-Dichloropropene | 0.002 | 0.001  |
| Freon11                | 0.337 | 0.342  | Toluene                   | 1.937 | 1.509  |
| 1-Pentene              | 0.037 | 0.033  | n-octane                  | 0.057 | 0.048  |
| trans-2-Pentene        | 0.019 | 0.014  | cis-1,3-Dichloropropene   | 0.001 | 0.000  |
| Isoprene               | 0.052 | 0.042  | 1,1,2-Trichloroethane     | 0.057 | 0.046  |
| Acrolein               | 0.212 | 0.201  | Tetrachloroethylene       | 0.077 | 0.043  |
| cis-2-Pentene          | 0.012 | 0.010  | n-Hexanal                 | 0.324 | 0.279  |
| Propanal               | 0.396 | 0.360  | 1,2-Dibromoethane         | 0.000 | 0.000  |
| 1,1-Dichloroethene     | 0.003 | 0.002  | Chlorobenzene             | 0.033 | 0.021  |
| Freon113               | 0.104 | 0.099  | Ethylbenzene              | 0.592 | 0.459  |
| 2,2-Dimethylbutane     | 0.037 | 0.035  | n-Nonane                  | 0.065 | 0.048  |
| Acetone                | 4.104 | 3.858  | m/p-Xylene                | 1.175 | 0.880  |
| Acetonitrile           | 0.427 | 0.380  | o-Xylene                  | 0.445 | 0.346  |
| Dichloromethane        | 4.786 | 2.091  | Styrene                   | 0.319 | 0.193  |
| 2,3-Dimethylbutane     | 0.061 | 0.052  | iso-Propylbenzene         | 0.024 | 0.016  |
| 2-Methylpentane        | 0.250 | 0.214  | n-Propylbenzene           | 0.024 | 0.020  |
| 3-Methylpentane        | 0.203 | 0.182  | m-Ethyltoluene            | 0.057 | 0.044  |
| MTBE                   | 0.331 | 0.277  | p-Ethyltoluene            | 0.029 | 0.023  |
| 1-Hexene               | 0.029 | 0.024  | n-Decane                  | 0.040 | 0.030  |
| n-Hexane               | 0.281 | 0.242  | 1,3,5-Trimethylbenzene    | 0.027 | 0.021  |
| Methacrolein           | 0.054 | 0.047  | o-Ethyltoluene            | 0.031 | 0.025  |
| 1,1-Dichloroethane     | 0.022 | 0.015  | 1,2,4-Trimethylbenzene    | 0.085 | 0.066  |
| 2,4-Dimethylpentane    | 0.026 | 0.021  | 1,3-Dichlorobenzene       | 0.003 | 0.002  |
| n-Butanal              | 0.228 | 0.200  | 1,4-Dichlorobenzene       | 0.015 | 0.012  |
| Methylvinylketone      | 0.065 | 0.059  | 1,2,3-Trimethylbenzene    | 0.031 | 0.024  |
| Methylcyclopentane     | 0.120 | 0.099  | Benzylchloride            | 0.002 | 0.002  |
| cis-1,2-Dichloroethene | 0.003 | 0.003  | m-Diethylbenzene          | 0.010 | 0.008  |
| Methylethylketone      | 1.260 | 0.904  | p-Diethylbenzene          | 0.033 | 0.024  |

---

| Species               | Mean  | Median | Species             | Mean  | Median |
|-----------------------|-------|--------|---------------------|-------|--------|
| Chloroform            | 0.282 | 0.216  | 1,2-Dichlorobenzene | 0.005 | 0.004  |
| 1,1,1-Trichloroethane | 0.004 | 0.004  | <i>n</i> -Undecane  | 0.054 | 0.040  |

---
